# Supplementary material
Source: publisher figshare collection journal article supplement (https://acs.figshare.com/ndownloader/files/3890269)
Supplement: Supplementary file 1 [file 3890269]

## Supporting Information

### **Preparation and evaluation of water-compatible surface molecularly imprinted polymers for selective adsorption of bisphenol A from aqueous solution**

**Feifei Duan<sup>1,2,3</sup>, Chaoqiu Chen<sup>2</sup>, Lin Chen<sup>1,3</sup>, Yongjiao Sun<sup>5</sup>, Yunwei Wang<sup>2</sup>, Yongzhen Yang<sup>1,4</sup>, Xuguang Liu<sup>1,3\*</sup>, Yong Qin<sup>2\*</sup>**

<sup>1</sup> *Key Laboratory of Interface Science and Engineering in Advanced Materials (Taiyuan University of Technology), Ministry of Education, Taiyuan 030024, China*

<sup>2</sup> *State Key Laboratory of Coal Conversion, Institute of Coal Chemistry, Chinese Academy of Sciences, Taiyuan 030024, China*

<sup>3</sup> *College of Chemistry and Chemical Engineering, Taiyuan University of Technology, Taiyuan 030024, China*

<sup>4</sup> *Research Center on Advanced Materials Science and Technology, Taiyuan University of Technology, Taiyuan 030024, China*

<sup>5</sup> *College of Information Engineering, Taiyuan University of Technology, Taiyuan 030024, China*

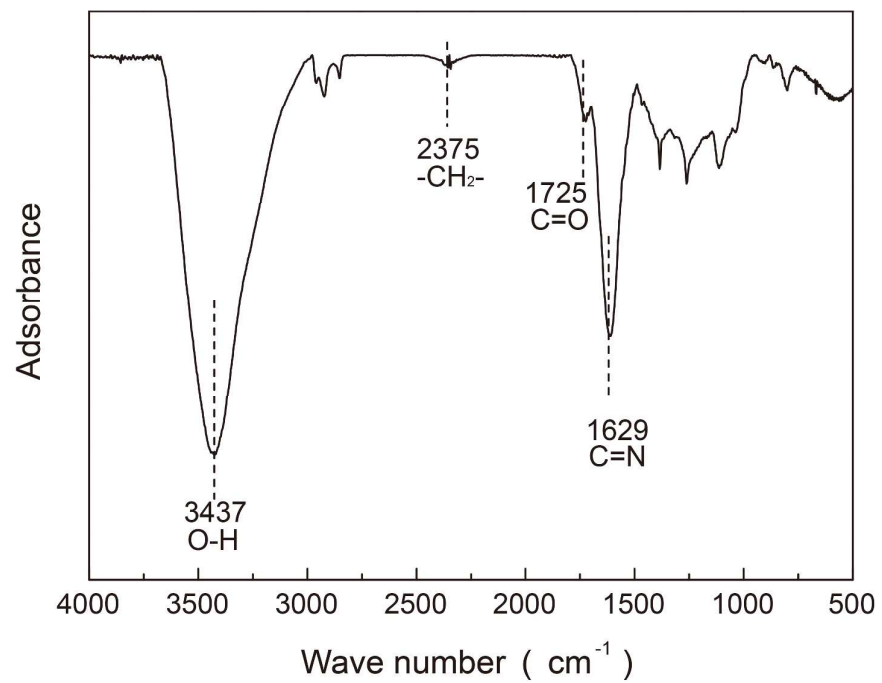

Figure S1. FTIR spectrum of 4-VP/MIPs.

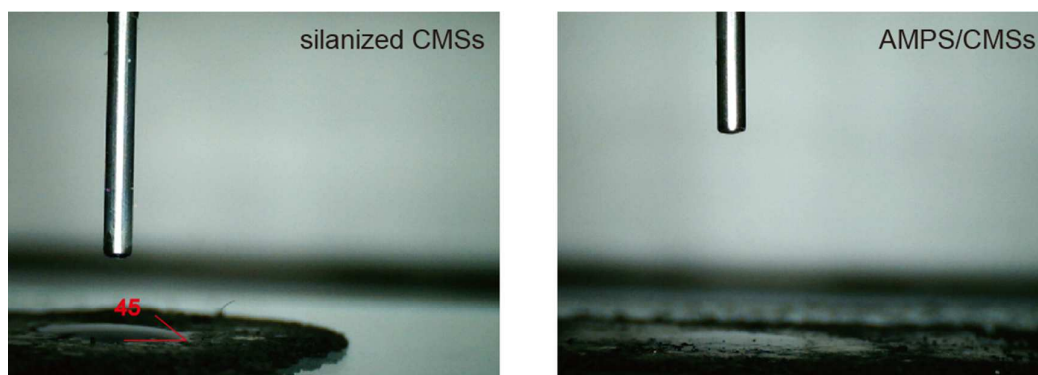

Figure S2. The contact angle of silanized CMSs and AMPS/CMSs.

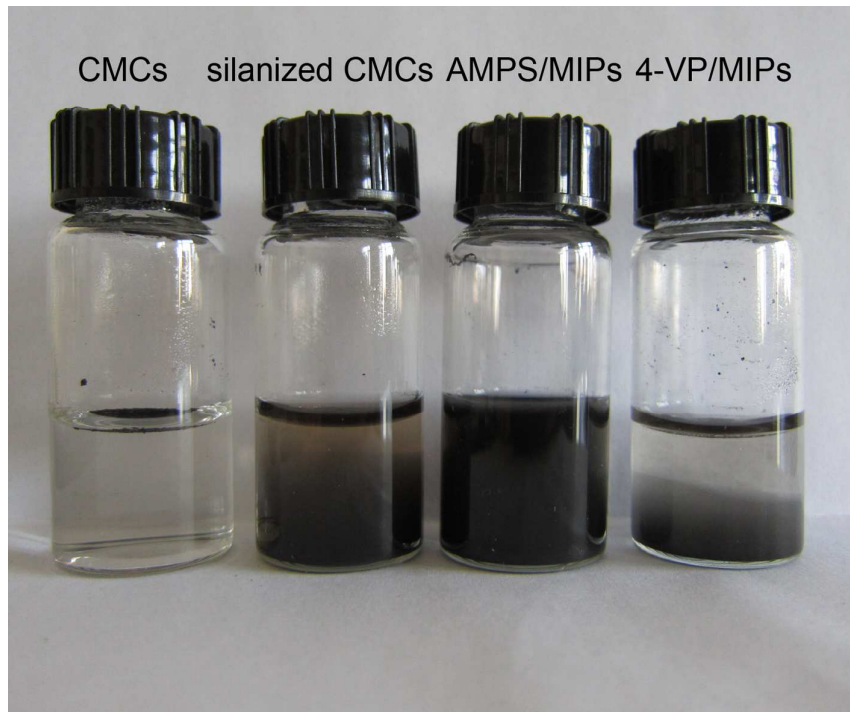

Figure S3. Photograph showing the dispersion of CMCs and functionalized CMCs in pure water (1 mg/mL) at 25 °C (after settling down for 24 h).

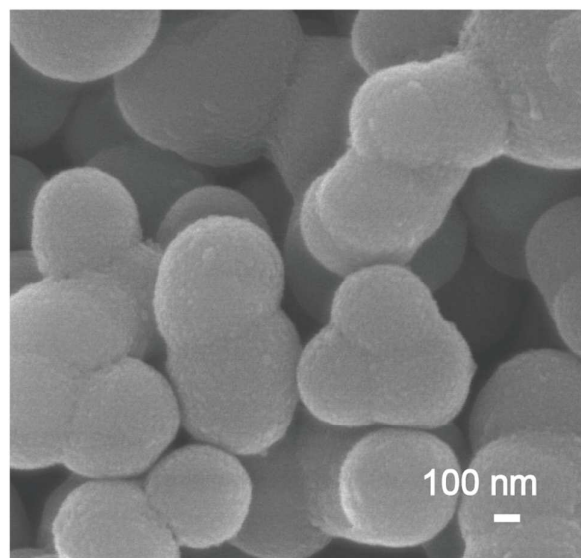

Figure S4. The SEM image of AMPS/NIPs.

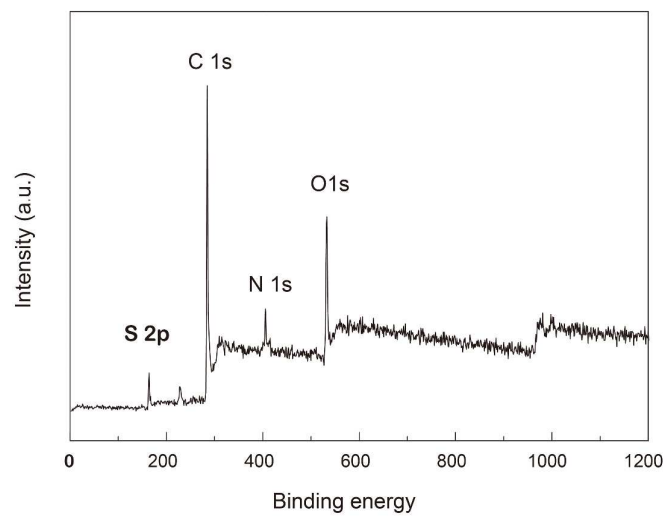

Figure S5. The XPS spectrum of AMPS/MIPs.

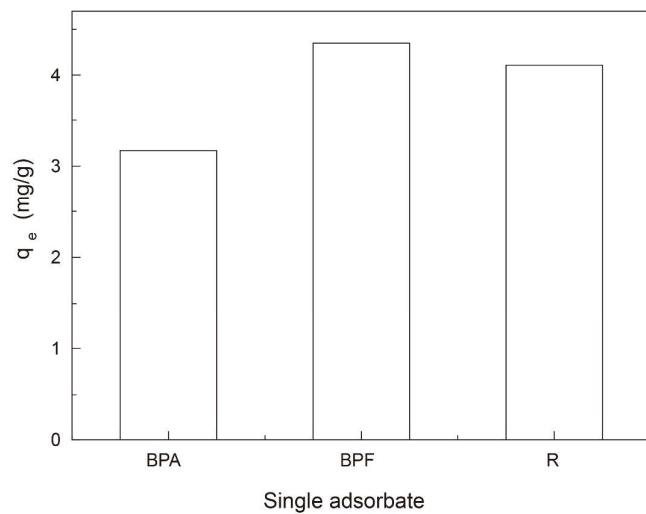

Figure S6. The binding capacity of oxidized carbon microspheres to BPA (50 mg of samples in 50 mL 50 mg/L BPA solution, 20°C).

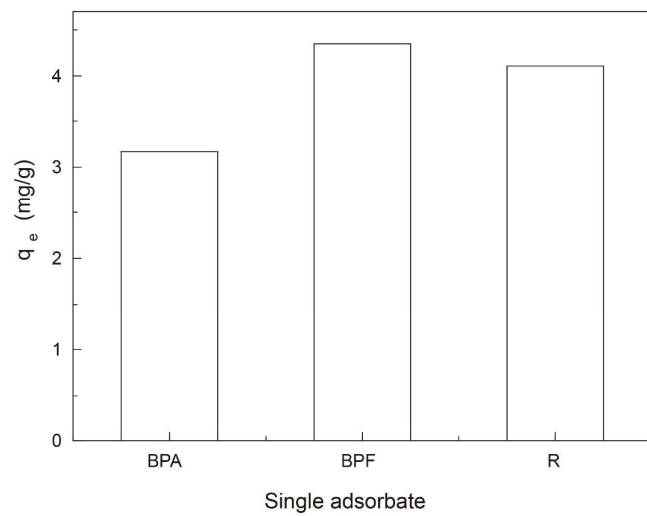

Figure S7. Selective adsorption of oxidized CMSs.
